# Supplementary material for: The gut microbiota in conventional and serrated precursors of colorectal cancer
Source: PubMed Central journal article supplement (PMC5203720; doi:10.1186/s40168-016-0218-6), 2016-12-30
Supplement: 40168_2016_218_MOESM1_ESM.pdf [file 40168_2016_218_MOESM1_ESM.pdf]

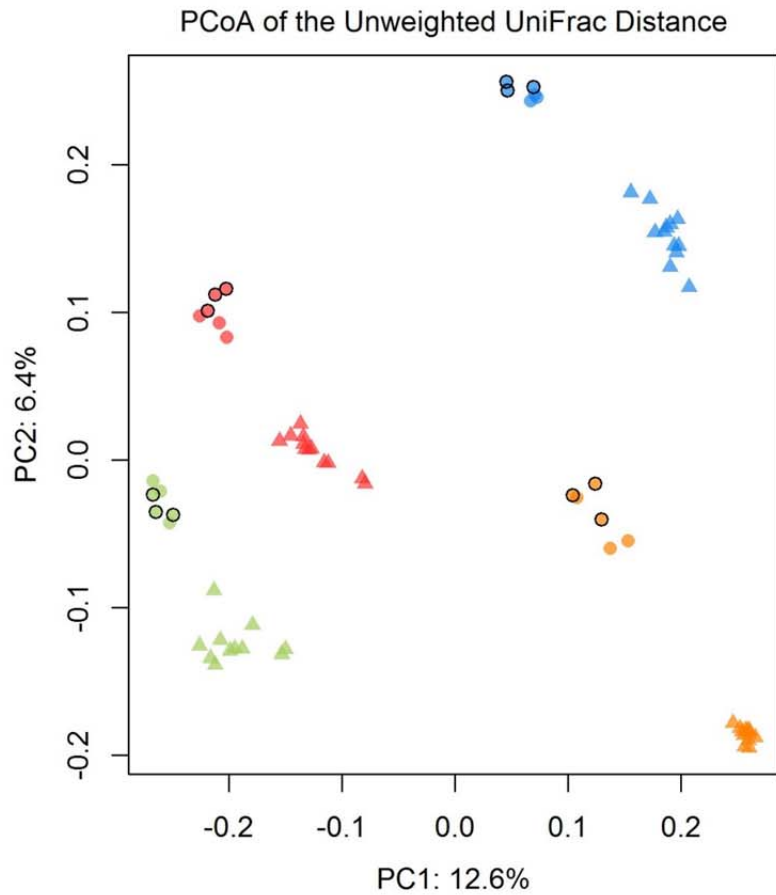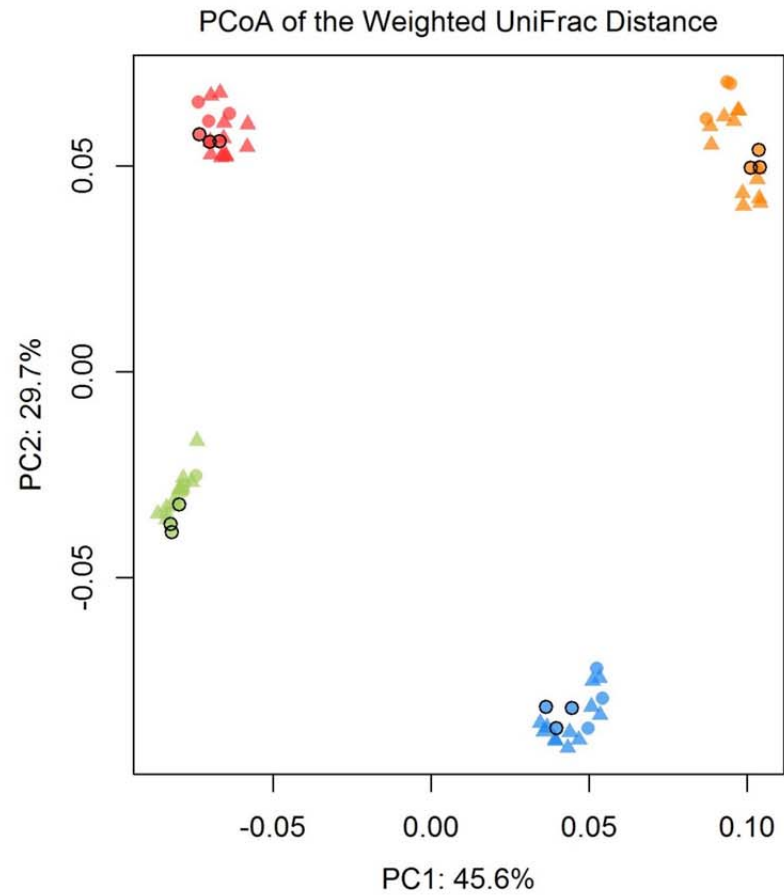

**Supplementary Figure 1.** Principal coordinate analysis (PCoA) of the unweighted and weighted UniFrac distances for quality control stool specimens provided by 4 volunteers. The 4 volunteers are differentiated by color, with triangles representing the repeats sequenced in the two CDC sequencing batches, and circles representing the repeats sequenced in the NYU sequencing batch. Circles outlined in black represent quality control stool specimens in the NYU batch that were treated with Beckman Coulter Hemocult SENSE developer.

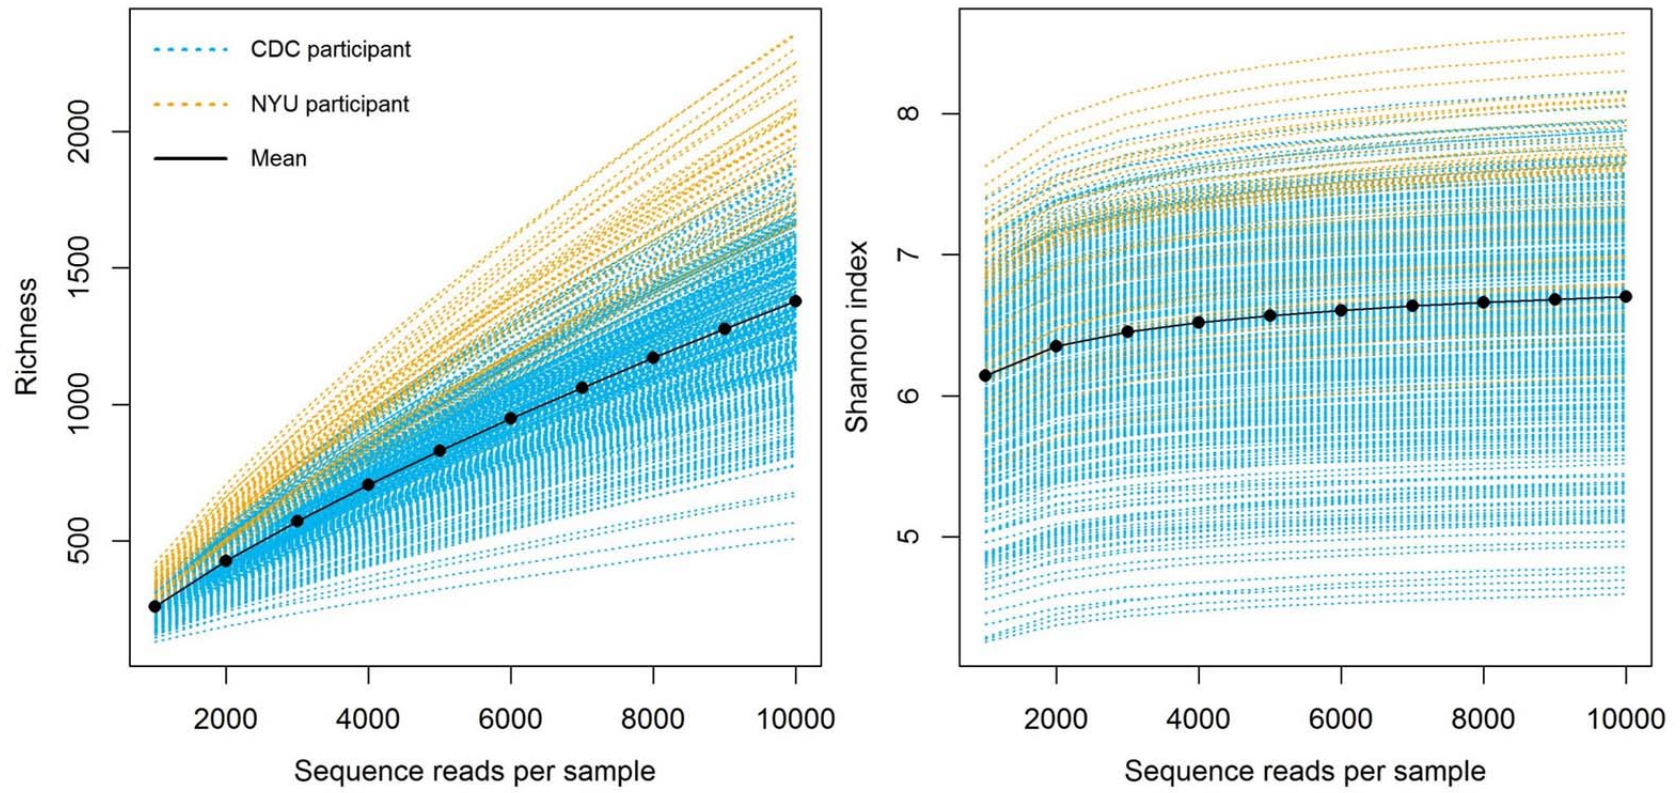

**Supplementary Figure 2.** Rarefaction curves of richness and the Shannon index. These indices were calculated for 500 iterations of rarefied OTU tables, and the average over the iterations was taken for each participant. n=438 participants with sequencing depths  $\geq 10,000$  are plotted.

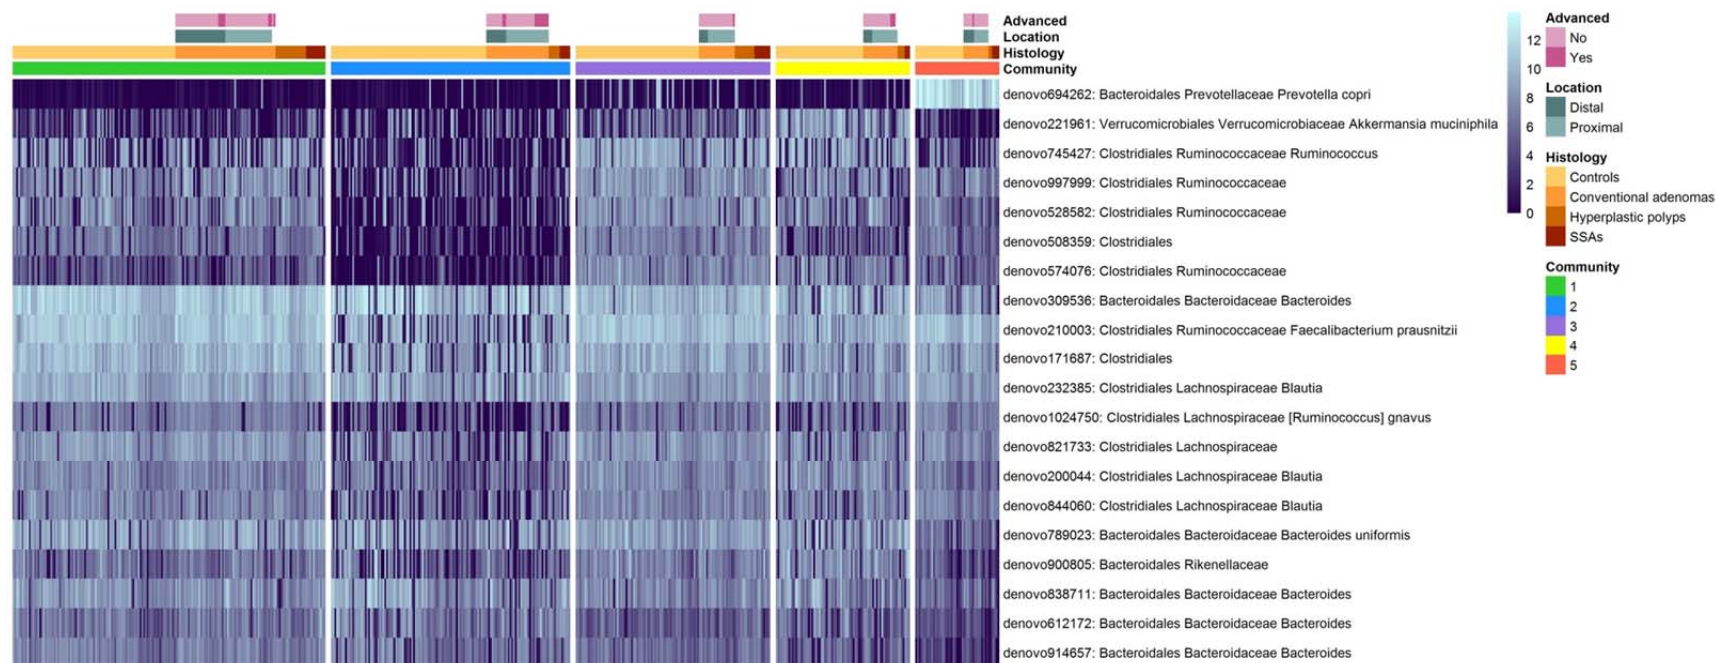

**Supplementary Figure 3.** Count heatmap of top 20 OTUs contributing the most to the Dirichlet components of the Dirichlet multinomial mixture model. For heatmap display, counts were normalized for DESeq2 size factors and log2 transformed after adding a pseudocount of 1.

**Supplementary Table 1.** Quality control intra-class correlation coefficients (ICCs) and 95% CIs for the Shannon index and normalized counts of selected phyla and genera. Six repeats from four volunteers were included in each of 3 sequencing batches (2 CDC, 1 NYU) for a total of 72 quality control samples. Counts were normalized by dividing the raw counts by DESeq size factors.

|                  | <b>CDC</b>        | <b>NYU</b>        | <b>All</b>        |
|------------------|-------------------|-------------------|-------------------|
| Shannon Index    | 0.98 (0.94, 1)    | 0.98 (0.93, 1)    | 0.88 (0.69, 0.99) |
| Firmicutes       | 0.7 (0.38, 0.97)  | 0.61 (0.22, 0.96) | 0.66 (0.35, 0.97) |
| Coprococcus      | 0.94 (0.81, 1)    | 0.88 (0.63, 0.99) | 0.92 (0.77, 0.99) |
| Lachnospira      | 0.99 (0.98, 1)    | 0.99 (0.97, 1)    | 0.99 (0.97, 1)    |
| Blautia          | 0.96 (0.88, 1)    | 0.97 (0.88, 1)    | 0.97 (0.89, 1)    |
| Faecalibacterium | 0.89 (0.69, 0.99) | 0.89 (0.66, 0.99) | 0.87 (0.66, 0.99) |
| Ruminococcus     | 0.99 (0.97, 1)    | 1 (0.98, 1)       | 0.99 (0.97, 1)    |
| Dorea            | 0.81 (0.54, 0.98) | 0.65 (0.27, 0.97) | 0.77 (0.49, 0.98) |
| Bacteroidetes    | 0.77 (0.48, 0.98) | 0.65 (0.27, 0.97) | 0.74 (0.45, 0.98) |
| Bacteroides      | 0.81 (0.55, 0.98) | 0.83 (0.53, 0.99) | 0.83 (0.58, 0.99) |
| Proteobacteria   | 0.51 (0.19, 0.94) | 0.5 (0.12, 0.94)  | 0.52 (0.22, 0.94) |
| Sutterella       | 0.4 (0.12, 0.91)  | 0.52 (0.14, 0.95) | 0.41 (0.15, 0.91) |
| Actinobacteria   | 0.92 (0.76, 0.99) | 0.85 (0.58, 0.99) | 0.87 (0.67, 0.99) |
| Bifidobacterium  | 0.94 (0.83, 1)    | 0.93 (0.78, 1)    | 0.92 (0.77, 0.99) |

**Supplementary Table 2.** Number of participants with polyp(s) in the specified colon locations, stratified by assignment into case type and polyp location groupings used in analysis. Proximal polyps were defined as polyps located in the cecum, ascending colon, hepatic flexure, transverse colon, or splenic flexure, and distal polyps were defined as polyps located in the descending colon, sigmoid colon, or rectum. We classified participants as either proximal or distal cases based on the location of their polyp(s); participants with both proximal and distal polyps were classified as distal cases. Numbers will sum to greater than group sample sizes due to multiple polyps with differing locations per participant.

|                  | Conventional adenoma cases (n=144) |               | Hyperplastic polyp cases (n=40) |               | SSA cases (n=33) |              |
|------------------|------------------------------------|---------------|---------------------------------|---------------|------------------|--------------|
|                  | Proximal (n=87)                    | Distal (n=55) | Proximal (n=6)                  | Distal (n=34) | Proximal (n=30)  | Distal (n=3) |
| Cecum            | 25                                 | 6             | 0                               | 1             | 10               | 0            |
| Ascending colon  | 38                                 | 7             | 3                               | 0             | 13               | 0            |
| Hepatic flexure  | 9                                  | 1             | 0                               | 0             | 1                | 0            |
| Transverse colon | 33                                 | 5             | 4                               | 2             | 7                | 1            |
| Splenic flexure  | 3                                  | 1             | 0                               | 1             | 0                | 0            |
| Descending colon | 0                                  | 16            | 0                               | 2             | 0                | 1            |
| Sigmoid colon    | 0                                  | 30            | 0                               | 23            | 0                | 1            |
| Rectum           | 0                                  | 11            | 0                               | 15            | 0                | 1            |

**Supplementary Table 3.** Richness and Shannon diversity index by group.

|                      | Richness <sup>a</sup> |                         |                      | Shannon index <sup>a</sup> |                         |                      |
|----------------------|-----------------------|-------------------------|----------------------|----------------------------|-------------------------|----------------------|
|                      | Mean (95% CI)         | B (95% CI) <sup>b</sup> | P-value <sup>b</sup> | Mean (95% CI)              | B (95% CI) <sup>b</sup> | P-value <sup>b</sup> |
| Controls (n=322)     | 740 (722, 758)        | NA                      | NA                   | 6.6 (6.5, 6.7)             | NA                      | NA                   |
| CA cases (n=144)     | 726 (697, 755)        | -28.6 (-53.8, -3.4)     | 0.03                 | 6.5 (6.4, 6.6)             | -0.11 (-0.25, 0.02)     | 0.09                 |
| Proximal (n=87)      | 726 (687, 765)        | -25.6 (-55.9, 4.6)      | 0.10                 | 6.5 (6.4, 6.7)             | -0.09 (-0.25, 0.07)     | 0.27                 |
| Distal (n=55)        | 725 (682, 768)        | -30.7 (-66.9, 5.4)      | 0.10                 | 6.5 (6.3, 6.6)             | -0.14 (-0.33, 0.05)     | 0.14                 |
| Non-advanced (n=121) | 721 (690, 752)        | -19.0 (-45.8, 7.8)      | 0.16                 | 6.5 (6.4, 6.6)             | -0.08 (-0.22, 0.06)     | 0.28                 |
| Advanced (n=22)      | 744 (655, 832)        | -80.1 (-134.5, -25.6)   | 0.004                | 6.5 (6.1, 6.8)             | -0.32 (-0.60, -0.03)    | 0.03                 |
| HP cases (n=40)      | 818 (773, 863)        | 35.6 (-5.9, 77.2)       | 0.09                 | 6.9 (6.7, 7.1)             | 0.20 (-0.01, 0.42)      | 0.07                 |
| SSA cases (n=33)     | 711 (660, 763)        | -1.2 (-46.2, 43.7)      | 0.96                 | 6.5 (6.3, 6.8)             | 0.02 (-0.22, 0.25)      | 0.89                 |

<sup>a</sup>These indices were calculated for 500 iterations of rarefied (4000 sequences per sample) OTU tables, and the average over the iterations was taken for each participant (1 control excluded due to sequencing depth=2088).

<sup>b</sup>Betas and p-values for difference between cases and controls from multiple linear regression, adjusting for age, sex, categorical BMI, and study.

**Supplementary Table 4.** Differentially abundant OTUs between controls and conventional adenoma cases, hyperplastic polyp cases, or SSA cases, as detected by the DESeq function in the DESeq2 package. Models were adjusted for age, sex, categorical BMI, and study. All OTUs with an FDR-adjusted  $q < 0.10$  are included in the table.

| Taxon name   | Taxon classification                                                                 | Level | Conventional adenoma cases vs. controls |                 |                      |           |           |                      | Hyperplastic polyp cases vs. controls |           |                      | SSA cases vs. controls |           |  |
|--------------|--------------------------------------------------------------------------------------|-------|-----------------------------------------|-----------------|----------------------|-----------|-----------|----------------------|---------------------------------------|-----------|----------------------|------------------------|-----------|--|
|              |                                                                                      |       | Mean                                    | Maximum         | Fold change (95% CI) | p-value   | q-value   | Fold change (95% CI) | p-value                               | q-value   | Fold change (95% CI) | p-value                | q-value   |  |
|              |                                                                                      |       | normalized                              | Cook's distance |                      |           |           |                      |                                       |           |                      |                        |           |  |
| denovo783221 | Actinobacteria; Actinobacteria; Actinomycetales; Actinomycetaceae; Actinomycetes; NA | OTU   | 2.33                                    | 0.08            | 1.54 (1.2, 1.97)     | 0.0007541 | 0.0797238 | 1.33 (0.89, 1.98)    | 0.1608159                             | 0.9974069 | 1.01 (0.67, 1.53)    | 0.9532205              | 0.998464  |  |
| denovo194049 | Firmicutes; Bacilli; Lactobacillales; Lactobacillaceae; Lactobacillus; zeae          | OTU   | 1.92                                    | 6.39            | 2.93 (1.62, 5.32)    | 0.0003857 | 0.0529539 | 4.65 (2.21, 9.79)    | 5.35E-05                              | 0.062395  | 1.36 (0.64, 2.91)    | 0.4225708              | 0.9816193 |  |
| denovo945918 | Firmicutes; Bacilli; Lactobacillales; Streptococcaceae; Streptococcus; NA            | OTU   | 4.86                                    | 0.07            | 1.81 (1.31, 2.52)    | 0.0003834 | 0.0529539 | 1 (0.6, 1.65)        | 0.9928819                             | 0.9982711 | 0.97 (0.57, 1.64)    | 0.9111805              | 0.9969289 |  |
| denovo721147 | Firmicutes; Clostridia; Clostridiales; [Mogibacteriaceae]; NA; NA                    | OTU   | 0.82                                    | 0.12            | 0.43 (0.26, 0.69)    | 0.0004905 | 0.0602595 | 0.49 (0.25, 0.95)    | 0.0343854                             | 0.9974069 | 0.42 (0.21, 0.83)    | 0.0120193              | 0.6860067 |  |
| denovo287355 | Firmicutes; Clostridia; Clostridiales; Clostridiaceae; Clostridium; NA               | OTU   | 0.5                                     | 0.07            | 0.26 (0.14, 0.49)    | 2.73E-05  | 0.0212064 | 0.76 (0.36, 1.61)    | 0.4699403                             | 0.9974069 | 1.24 (0.58, 2.65)    | 0.5829021              | 0.9816193 |  |
| denovo670267 | Firmicutes; Clostridia; Clostridiales; Lachnospiraceae; Coprococcus; NA              | OTU   | 2.91                                    | 0.03            | 0.64 (0.5, 0.81)     | 0.0002113 | 0.0529539 | 0.93 (0.64, 1.34)    | 0.6899157                             | 0.9974069 | 0.57 (0.38, 0.84)    | 0.0046425              | 0.6373929 |  |
| denovo785907 | Firmicutes; Clostridia; Clostridiales; Lachnospiraceae; Coprococcus; NA              | OTU   | 1.24                                    | 0.03            | 0.58 (0.44, 0.78)    | 0.0002038 | 0.0529539 | 0.94 (0.61, 1.44)    | 0.777574                              | 0.9974069 | 0.95 (0.62, 1.47)    | 0.8187952              | 0.9946789 |  |
| denovo189398 | Firmicutes; Clostridia; Clostridiales; Lachnospiraceae; Dorea; NA                    | OTU   | 12.01                                   | 6.48            | 2.54 (1.6, 4.04)     | 8.30E-05  | 0.0455492 | 1.06 (0.55, 2.02)    | 0.8654718                             | 0.9974069 | 1.95 (1, 3.81)       | 0.0494073              | 0.8164556 |  |
| denovo166416 | Firmicutes; Clostridia; Clostridiales; Lachnospiraceae; NA; NA                       | OTU   | 0.27                                    | 0.03            | 0.42 (0.25, 0.71)    | 0.0009851 | 0.0921308 | 0.74 (0.38, 1.46)    | 0.3888154                             | 0.9974069 | 0.53 (0.27, 1.06)    | 0.0741795              | 0.8744457 |  |
| denovo333913 | Firmicutes; Clostridia; Clostridiales; Lachnospiraceae; NA; NA                       | OTU   | 1.97                                    | 0.05            | 0.52 (0.37, 0.74)    | 0.0002494 | 0.0529539 | 0.79 (0.47, 1.33)    | 0.3812259                             | 0.9974069 | 1.03 (0.61, 1.74)    | 0.9218755              | 0.9969289 |  |
| denovo442772 | Firmicutes; Clostridia; Clostridiales; Lachnospiraceae; NA; NA                       | OTU   | 8.35                                    | 0.06            | 2.03 (1.39, 2.97)    | 0.0002673 | 0.0529539 | 1.71 (0.98, 2.99)    | 0.0598828                             | 0.9974069 | 1.4 (0.78, 2.52)     | 0.2594323              | 0.9667013 |  |
| denovo501253 | Firmicutes; Clostridia; Clostridiales; Lachnospiraceae; NA; NA                       | OTU   | 0.67                                    | 0.02            | 0.54 (0.38, 0.77)    | 0.0005793 | 0.0652509 | 0.85 (0.51, 1.42)    | 0.5348151                             | 0.9974069 | 0.84 (0.51, 1.4)     | 0.5124426              | 0.9816193 |  |
| denovo521268 | Firmicutes; Clostridia; Clostridiales; Lachnospiraceae; NA; NA                       | OTU   | 1.57                                    | 1.9             | 0.23 (0.12, 0.43)    | 5.06E-06  | 0.0059039 | 0.52 (0.24, 1.11)    | 0.0885387                             | 0.9974069 | 0.3 (0.14, 0.65)     | 0.0023442              | 0.6028575 |  |
| denovo74320  | Firmicutes; Clostridia; Clostridiales; Lachnospiraceae; NA; NA                       | OTU   | 5.64                                    | 0.47            | 0.62 (0.47, 0.81)    | 0.0005871 | 0.0652509 | 0.32 (0.21, 0.51)    | 8.00E-07                              | 0.0018611 | 0.67 (0.43, 1.05)    | 0.0840296              | 0.8846448 |  |
| denovo930802 | Firmicutes; Clostridia; Clostridiales; Lachnospiraceae; NA; NA                       | OTU   | 0.32                                    | 0.04            | 0.37 (0.22, 0.61)    | 9.76E-05  | 0.0455492 | 0.94 (0.49, 1.81)    | 0.8632145                             | 0.9974069 | 1.34 (0.7, 2.54)     | 0.3745806              | 0.9816193 |  |
| denovo507939 | Firmicutes; Clostridia; Clostridiales; NA; NA; NA                                    | OTU   | 1.26                                    | 0.08            | 0.37 (0.2, 0.67)     | 0.0009868 | 0.0921308 | 0.56 (0.27, 1.18)    | 0.1269506                             | 0.9974069 | 0.77 (0.36, 1.63)    | 0.4961934              | 0.9816193 |  |
| denovo556761 | Firmicutes; Clostridia; Clostridiales; NA; NA; NA                                    | OTU   | 1.33                                    | 0.07            | 0.58 (0.43, 0.79)    | 0.0004538 | 0.0588485 | 1.39 (0.89, 2.17)    | 0.1486189                             | 0.9974069 | 0.82 (0.51, 1.32)    | 0.4140237              | 0.9816193 |  |
| denovo661611 | Firmicutes; Clostridia; Clostridiales; NA; NA; NA                                    | OTU   | 8.24                                    | 0.14            | 0.34 (0.19, 0.61)    | 0.0003075 | 0.0529539 | 0.43 (0.2, 0.91)     | 0.0269111                             | 0.9974069 | 0.52 (0.25, 1.11)    | 0.0913407              | 0.8995322 |  |
| denovo787660 | Firmicutes; Clostridia; Clostridiales; NA; NA; NA                                    | OTU   | 2.36                                    | 0.01            | 0.34 (0.19, 0.6)     | 0.0001547 | 0.0529539 | 0.57 (0.28, 1.17)    | 0.1255377                             | 0.9974069 | 0.88 (0.42, 1.84)    | 0.7407964              | 0.9944157 |  |
| denovo918201 | Firmicutes; Clostridia; Clostridiales; NA; NA; NA                                    | OTU   | 1.08                                    | 0.83            | 0.33 (0.18, 0.6)     | 0.0003347 | 0.0529539 | 0.64 (0.3, 1.36)     | 0.2433705                             | 0.9974069 | 0.51 (0.24, 1.1)     | 0.0861417              | 0.885704  |  |
| denovo12383  | Firmicutes; Clostridia; Clostridiales; Ruminococcaceae; NA; NA                       | OTU   | 2.16                                    | 0.02            | 0.15 (0.08, 0.27)    | 1.68E-09  | 3.92E-06  | 0.33 (0.16, 0.71)    | 0.0041741                             | 0.7609434 | 0.71 (0.33, 1.51)    | 0.3722412              | 0.9816193 |  |
| denovo294260 | Firmicutes; Clostridia; Clostridiales; Ruminococcaceae; NA; NA                       | OTU   | 2.69                                    | 0.08            | 0.52 (0.36, 0.74)    | 0.0003461 | 0.0529539 | 0.88 (0.52, 1.49)    | 0.6238931                             | 0.9974069 | 1.63 (0.94, 2.8)     | 0.0795624              | 0.8744457 |  |
| denovo327852 | Firmicutes; Clostridia; Clostridiales; Ruminococcaceae; NA; NA                       | OTU   | 1.44                                    | 0.39            | 0.42 (0.25, 0.7)     | 0.0007856 | 0.0797238 | 0.9 (0.46, 1.76)     | 0.7520327                             | 0.9974069 | 0.84 (0.42, 1.67)    | 0.6171457              | 0.9816193 |  |
| denovo381284 | Firmicutes; Clostridia; Clostridiales; Ruminococcaceae; NA; NA                       | OTU   | 0.83                                    | 0.08            | 0.49 (0.34, 0.71)    | 0.0001804 | 0.0529539 | 0.8 (0.47, 1.36)     | 0.4104935                             | 0.9974069 | 1.57 (0.93, 2.65)    | 0.0936223              | 0.9080103 |  |
| denovo699246 | Firmicutes; Clostridia; Clostridiales; Ruminococcaceae; NA; NA                       | OTU   | 2.06                                    | 0.52            | 0.42 (0.26, 0.67)    | 0.0003301 | 0.0529539 | 0.61 (0.32, 1.18)    | 0.1434552                             | 0.9974069 | 1.48 (0.76, 2.89)    | 0.2451824              | 0.9667013 |  |

**Supplementary Table 5.** Differentially abundant taxa (phylum-genus levels) between controls and conventional adenoma cases, hyperplastic polyp cases, or SSA cases, as detected by the DESeq function in the DESeq2 package. Models were adjusted for age, sex, categorical BMI, and study. All taxa with an FDR-adjusted  $q < 0.10$  are included in the table.

| Taxon name   | Taxon classification                                                                 | Level  | Mean<br>normalized<br>count | Maximum<br>Cook's<br>distance | Conventional adenoma cases vs. controls |           |           | Hyperplastic polyp cases vs. controls |           |           | SSA cases vs. controls |           |           |
|--------------|--------------------------------------------------------------------------------------|--------|-----------------------------|-------------------------------|-----------------------------------------|-----------|-----------|---------------------------------------|-----------|-----------|------------------------|-----------|-----------|
|              |                                                                                      |        |                             |                               | Fold change (95% CI)                    | p-value   | q-value   | Fold change (95% CI)                  | p-value   | q-value   | Fold change (95% CI)   | p-value   | q-value   |
| denovo783221 | Actinobacteria; Actinobacteria; Actinomycetales                                      | Order  | 6.44                        | 1.18                          | 1.87 (1.45, 2.4)                        | 1.00E-06  | 1.05E-05  | 1.29 (0.85, 1.96)                     | 0.2280748 | 0.9252491 | 0.98 (0.63, 1.53)      | 0.9445333 | 0.9445333 |
| denovo783221 | Actinobacteria; Actinobacteria; Actinomycetales; Actinomycetaceae                    | Family | 6.99                        | 0.23                          | 1.51 (1.18, 1.93)                       | 0.0010002 | 0.008185  | 1.06 (0.7, 1.58)                      | 0.7949538 | 0.9909394 | 1 (0.65, 1.53)         | 0.9983433 | 0.9983433 |
| denovo783221 | Actinobacteria; Actinobacteria; Actinomycetales; Actinomycetaceae; Actinomycetes     | Genus  | 9.09                        | 0.58                          | 1.69 (1.32, 2.17)                       | 3.19E-05  | 0.0006215 | 1.24 (0.82, 1.87)                     | 0.2985497 | 0.9899234 | 1.07 (0.7, 1.64)       | 0.7524244 | 0.9764617 |
| denovo184823 | Actinobacteria; Actinobacteria; Actinomycetales; Corynebacteriaceae                  | Family | 0.93                        | 1.35                          | 3.3 (1.67, 6.51)                        | 0.0005737 | 0.0061678 | 0.75 (0.27, 2.09)                     | 0.5880726 | 0.9909394 | 0.91 (0.32, 2.57)      | 0.8605133 | 0.9923738 |
| denovo184823 | Actinobacteria; Actinobacteria; Actinomycetales; Corynebacteriaceae; Corynebacterium | Genus  | 1.03                        | 2                             | 3.73 (1.88, 7.4)                        | 0.0001705 | 0.0022162 | 0.78 (0.28, 2.22)                     | 0.6465213 | 0.9899234 | 0.86 (0.3, 2.5)        | 0.7873682 | 0.9764617 |
| denovo199602 | Cyanobacteria                                                                        | Phylum | 44.75                       | 0.01                          | 0.46 (0.26, 0.81)                       | 0.0076452 | 0.0764519 | 0.59 (0.26, 1.37)                     | 0.2224569 | 0.5630235 | 0.81 (0.33, 1.96)      | 0.6378759 | 0.8554366 |
| denovo317079 | Firmicutes; Bacilli                                                                  | Class  | 506.27                      | 2.31                          | 2.11 (1.6, 2.78)                        | 1.40E-07  | 2.45E-06  | 1.23 (0.78, 1.94)                     | 0.3707783 | 0.9961489 | 0.79 (0.49, 1.3)       | 0.3582352 | 0.7884667 |
| denovo317079 | Firmicutes; Bacilli; Lactobacillales                                                 | Order  | 468.25                      | 2.31                          | 2.25 (1.68, 3.02)                       | 7.00E-08  | 1.51E-06  | 1.31 (0.81, 2.12)                     | 0.2699278 | 0.9252491 | 0.73 (0.43, 1.22)      | 0.2319356 | 0.8684908 |
| denovo317079 | Firmicutes; Bacilli; Lactobacillales; Streptococcaceae                               | Family | 377.94                      | 1.04                          | 2.03 (1.52, 2.73)                       | 2.05E-06  | 4.40E-05  | 1.09 (0.68, 1.75)                     | 0.7077718 | 0.9909394 | 0.66 (0.4, 1.1)        | 0.1136901 | 0.5431862 |
| denovo317079 | Firmicutes; Bacilli; Lactobacillales; Streptococcaceae; Streptococcus                | Genus  | 422.22                      | 2.79                          | 2.38 (1.76, 3.21)                       | 2.00E-08  | 1.35E-06  | 1.26 (0.78, 2.05)                     | 0.3450591 | 0.9899234 | 0.72 (0.43, 1.21)      | 0.2163889 | 0.6491668 |
| denovo220332 | Firmicutes; Clostridia; Clostridiales; [Mogibacteriaceae]                            | Family | 17.61                       | 0.91                          | 0.8 (0.66, 0.96)                        | 0.015749  | 0.0752451 | 0.8 (0.59, 1.08)                      | 0.142205  | 0.679424  | 0.89 (0.64, 1.23)      | 0.4732812 | 0.8640164 |
| denovo220332 | Firmicutes; Clostridia; Clostridiales; [Mogibacteriaceae]; NA                        | Genus  | 16.24                       | 0.15                          | 0.78 (0.65, 0.94)                       | 0.0079306 | 0.0618584 | 0.85 (0.63, 1.15)                     | 0.2987712 | 0.9899234 | 0.89 (0.65, 1.22)      | 0.4524979 | 0.8823709 |
| denovo784890 | Firmicutes; Clostridia; Clostridiales; [Tissierellaceae]                             | Family | 6.72                        | 7.33                          | 2.87 (1.7, 4.83)                        | 7.63E-05  | 0.0010929 | 0.53 (0.23, 1.2)                      | 0.1264144 | 0.679424  | 0.9 (0.39, 2.09)       | 0.8042368 | 0.9923738 |
| denovo113729 | Firmicutes; Clostridia; Clostridiales; [Tissierellaceae]; Peptoniphilus              | Genus  | 1.6                         | 3.92                          | 3.41 (1.83, 6.35)                       | 0.0001158 | 0.001807  | 0.55 (0.21, 1.46)                     | 0.2297883 | 0.9899234 | 0.85 (0.32, 2.28)      | 0.7482896 | 0.9764617 |
| denovo871288 | Firmicutes; Clostridia; Clostridiales; Lachnospiraceae; Anaerostipes                 | Genus  | 45.7                        | 0.51                          | 1.23 (0.98, 1.54)                       | 0.0801276 | 0.297617  | 1.96 (1.36, 2.84)                     | 0.0003465 | 0.0270255 | 1.02 (0.69, 1.52)      | 0.9201848 | 0.9795153 |
| denovo23546  | Firmicutes; Clostridia; Clostridiales; Lachnospiraceae; Dorea                        | Genus  | 216.11                      | 0.09                          | 1.19 (1.05, 1.35)                       | 0.0073688 | 0.0618584 | 1.09 (0.88, 1.34)                     | 0.4269694 | 0.9899234 | 1 (0.8, 1.25)          | 0.980611  | 0.9933462 |
| denovo171687 | Firmicutes; Clostridia; Clostridiales; NA                                            | Family | 2415.19                     | 1.89                          | 1.23 (1.08, 1.39)                       | 0.0011421 | 0.008185  | 1.1 (0.9, 1.35)                       | 0.3630524 | 0.9695146 | 0.99 (0.8, 1.23)       | 0.926627  | 0.9923738 |
| denovo171687 | Firmicutes; Clostridia; Clostridiales; NA; NA                                        | Genus  | 2624.01                     | 3.99                          | 1.44 (1.26, 1.65)                       | 1.60E-07  | 6.31E-06  | 1.18 (0.94, 1.47)                     | 0.1566656 | 0.9182145 | 0.98 (0.77, 1.25)      | 0.8875646 | 0.9795153 |
| denovo422375 | Firmicutes; Clostridia; Clostridiales; Veillonellaceae                               | Family | 482.77                      | 7.34                          | 1.86 (1.44, 2.39)                       | 1.64E-06  | 4.40E-05  | 0.79 (0.52, 1.18)                     | 0.2493526 | 0.8935133 | 0.66 (0.43, 1.03)      | 0.067656  | 0.513957  |
| denovo437434 | Firmicutes; Clostridia; Clostridiales; Veillonellaceae; Phascolarctobacterium        | Genus  | 115.38                      | 5.19                          | 1.91 (1.24, 2.96)                       | 0.0035811 | 0.0399038 | 1.12 (0.57, 2.22)                     | 0.7434821 | 0.9899234 | 0.85 (0.41, 1.76)      | 0.6574771 | 0.9764617 |
| denovo628837 | Firmicutes; Erysipelotrichi                                                          | Class  | 305.79                      | 0.01                          | 0.92 (0.79, 1.07)                       | 0.2658247 | 0.5561808 | 1.1 (0.85, 1.41)                      | 0.468776  | 0.9961489 | 0.68 (0.52, 0.89)      | 0.0053337 | 0.0906733 |
| denovo973076 | Firmicutes; Erysipelotrichi; Erysipelotrichales; Erysipelotrichaceae; Coprobacillus  | Genus  | 10.77                       | 0.12                          | 0.59 (0.39, 0.88)                       | 0.0093364 | 0.0662034 | 0.36 (0.19, 0.68)                     | 0.0017059 | 0.0665298 | 1.03 (0.53, 2.01)      | 0.927493  | 0.9795153 |
| denovo880054 | Proteobacteria; Betaproteobacteria; Burkholderiales; Alcaligenaceae                  | Family | 312.49                      | 4.09                          | 1.5 (1.12, 2)                           | 0.0060492 | 0.0371593 | 0.83 (0.52, 1.32)                     | 0.4240249 | 0.9909394 | 0.82 (0.5, 1.36)       | 0.4478915 | 0.8640164 |
| denovo880054 | Proteobacteria; Betaproteobacteria; Burkholderiales; Alcaligenaceae; Sutterella      | Genus  | 430.21                      | 8                             | 2.06 (1.52, 2.78)                       | 3.31E-06  | 8.60E-05  | 0.84 (0.52, 1.37)                     | 0.4860878 | 0.9899234 | 0.97 (0.58, 1.65)      | 0.922579  | 0.9795153 |
| denovo846374 | Proteobacteria; Gammaproteobacteria                                                  | Class  | 394.44                      | 2.99                          | 1.81 (1.19, 2.76)                       | 0.0052077 | 0.044265  | 0.32 (0.16, 0.63)                     | 0.001045  | 0.0177653 | 0.43 (0.21, 0.88)      | 0.0217273 | 0.1846822 |
| denovo846374 | Proteobacteria; Gammaproteobacteria; Enterobacteriales                               | Order  | 364.65                      | 8.69                          | 2.05 (1.23, 3.4)                        | 0.005634  | 0.0317585 | 0.22 (0.1, 0.49)                      | 0.0002499 | 0.0052486 | 0.45 (0.19, 1.08)      | 0.0735366 | 0.7498433 |
| denovo789089 | Tenericutes; Mollicutes; RF39                                                        | Order  | 40.28                       | 0.03                          | 0.4 (0.21, 0.77)                        | 0.0060492 | 0.0317585 | 1.08 (0.39, 2.98)                     | 0.8806008 | 0.9991107 | 1.47 (0.5, 4.33)       | 0.4876755 | 0.8684908 |
| denovo789089 | Tenericutes; Mollicutes; RF39; NA                                                    | Family | 35.61                       | 0.05                          | 0.43 (0.23, 0.8)                        | 0.0078894 | 0.0424057 | 1.06 (0.42, 2.65)                     | 0.9025852 | 0.9909394 | 1.12 (0.43, 2.94)      | 0.8177589 | 0.9923738 |
| denovo789089 | Tenericutes; Mollicutes; RF39; NA; NA                                                | Genus  | 36.41                       | 0.06                          | 0.42 (0.22, 0.78)                       | 0.0061691 | 0.0601487 | 1.1 (0.44, 2.77)                      | 0.8425117 | 0.9899234 | 1.06 (0.4, 2.81)       | 0.909297  | 0.9795153 |





|              |                                                                                     |        |        |      |                   |           |           |                   |           |           |
|--------------|-------------------------------------------------------------------------------------|--------|--------|------|-------------------|-----------|-----------|-------------------|-----------|-----------|
| denovo411531 | Firmicutes; Clostridia; Clostridiales; Ruminococcaceae; NA; NA                      | OTU    | 0.72   | 0.06 | 0.86 (0.66, 1.13) | 0.2786098 | 0.9126333 | 0.45 (0.3, 0.67)  | 7.53E-05  | 0.0234869 |
| denovo699246 | Firmicutes; Clostridia; Clostridiales; Ruminococcaceae; NA; NA                      | OTU    | 2.07   | 0.54 | 0.8 (0.63, 1.01)  | 0.0649682 | 0.7037715 | 0.48 (0.34, 0.67) | 1.85E-05  | 0.0162921 |
| denovo705914 | Firmicutes; Clostridia; Clostridiales; Ruminococcaceae; NA; NA                      | OTU    | 13.08  | 0.04 | 0.91 (0.71, 1.18) | 0.4718418 | 0.9750606 | 0.49 (0.35, 0.7)  | 8.07E-05  | 0.0234869 |
| denovo879175 | Firmicutes; Clostridia; Clostridiales; Ruminococcaceae; NA; NA                      | OTU    | 0.73   | 0.04 | 0.9 (0.72, 1.13)  | 0.3822873 | 0.9491974 | 0.57 (0.41, 0.79) | 0.0007025 | 0.0681703 |
| denovo93364  | Firmicutes; Clostridia; Clostridiales; Ruminococcaceae; NA; NA                      | OTU    | 0.6    | 0.16 | 0.97 (0.73, 1.27) | 0.8097527 | 0.9878961 | 0.45 (0.3, 0.68)  | 0.0001306 | 0.0287557 |
| denovo326882 | Firmicutes; Clostridia; Clostridiales; Ruminococcaceae; Oscillospira; NA            | OTU    | 0.66   | 0.02 | 0.88 (0.69, 1.12) | 0.3138993 | 0.9287089 | 0.55 (0.39, 0.78) | 0.0008283 | 0.0771687 |
| denovo228423 | Firmicutes; Clostridia; Clostridiales; Ruminococcaceae; Ruminococcus; NA            | OTU    | 0.62   | 0.01 | 0.98 (0.76, 1.28) | 0.9024729 | 0.988145  | 0.48 (0.33, 0.7)  | 0.0001489 | 0.028907  |
| denovo326096 | Firmicutes; Clostridia; Clostridiales; Ruminococcaceae; Ruminococcus; NA            | OTU    | 36.13  | 0.14 | 1.04 (0.78, 1.38) | 0.7932217 | 0.9859538 | 0.44 (0.29, 0.67) | 0.0001358 | 0.0287557 |
| denovo859546 | Firmicutes; Clostridia; Clostridiales; Ruminococcaceae; Ruminococcus; NA            | OTU    | 1.04   | 0.01 | 1.06 (0.82, 1.37) | 0.654051  | 0.9814869 | 0.52 (0.36, 0.75) | 0.0004399 | 0.0542566 |
| denovo998823 | Firmicutes; Clostridia; Clostridiales; Ruminococcaceae; Ruminococcus; NA            | OTU    | 0.55   | 0.03 | 1.08 (0.82, 1.42) | 0.5883983 | 0.9801843 | 0.46 (0.3, 0.7)   | 0.0002816 | 0.0440046 |
| denovo422375 | Firmicutes; Clostridia; Clostridiales; Veillonellaceae                              | Family | 484.27 | 6.04 | 1.72 (1.48, 2)    | 1.00E-12  | 4.51E-11  | 0.99 (0.83, 1.18) | 0.8910024 | 0.9663512 |
| denovo437434 | Firmicutes; Clostridia; Clostridiales; Veillonellaceae; Phascolarctobacterium       | Genus  | 115.54 | 4.75 | 1.83 (1.41, 2.37) | 6.03E-06  | 7.63E-05  | 0.96 (0.71, 1.3)  | 0.7980424 | 0.9168133 |
| denovo50244  | Firmicutes; Erysipelotrichi; Erysipelotrichales; Erysipelotrichaceae; cc_115        | Genus  | 5.07   | 0.1  | 0.91 (0.64, 1.29) | 0.6033342 | 0.8817962 | 0.53 (0.35, 0.8)  | 0.0024572 | 0.0373499 |
| denovo973076 | Firmicutes; Erysipelotrichi; Erysipelotrichales; Erysipelotrichaceae; Coprobacillus | Genus  | 10.81  | 0.11 | 0.71 (0.56, 0.9)  | 0.0051427 | 0.0325703 | 0.88 (0.66, 1.16) | 0.3553808 | 0.7330248 |
| denovo188989 | Proteobacteria; Alphaproteobacteria; RF32; NA                                       | Family | 117.05 | 0.01 | 0.6 (0.42, 0.86)  | 0.0050957 | 0.0280265 | 0.91 (0.6, 1.37)  | 0.6490405 | 0.8653874 |
| denovo188989 | Proteobacteria; Alphaproteobacteria; RF32; NA; NA                                   | Genus  | 115.36 | 0.01 | 0.63 (0.44, 0.9)  | 0.0124022 | 0.062838  | 0.92 (0.61, 1.4)  | 0.7041616 | 0.8494647 |
| denovo880054 | Proteobacteria; Betaproteobacteria; Burkholderiales; Alcaligenaceae                 | Family | 313.06 | 3.67 | 1.44 (1.21, 1.71) | 3.01E-05  | 0.0002207 | 1 (0.81, 1.22)    | 0.9656724 | 0.9663512 |
| denovo880054 | Proteobacteria; Betaproteobacteria; Burkholderiales; Alcaligenaceae; Sutterella     | Genus  | 431.23 | 7.04 | 1.81 (1.51, 2.17) | 1.14E-10  | 2.88E-09  | 1.11 (0.9, 1.37)  | 0.342848  | 0.7330248 |
| denovo846374 | Proteobacteria; Gammaproteobacteria                                                 | Class  | 395.71 | 2.49 | 1.55 (1.24, 1.94) | 0.0001459 | 0.0012404 | 0.94 (0.7, 1.26)  | 0.6945111 | 0.8850375 |
| denovo846374 | Proteobacteria; Gammaproteobacteria; Enterobacteriales                              | Order  | 365.82 | 7.84 | 1.6 (1.23, 2.09)  | 0.000573  | 0.0040111 | 1.02 (0.71, 1.45) | 0.9217112 | 0.953799  |
| denovo948713 | Synergistetes                                                                       | Phylum | 2.53   | 7.17 | 1.08 (0.92, 1.25) | 0.3488038 | 0.7161231 | 0.49 (0.29, 0.84) | 0.0093674 | 0.0936743 |
| denovo654064 | Tenericutes; Mollicutes                                                             | Class  | 75.66  | 0.75 | 1.38 (1.02, 1.88) | 0.0398944 | 0.1695511 | 0.54 (0.35, 0.84) | 0.0065296 | 0.0801527 |

**Supplementary Table 7.** Differentially abundant taxa (phylum-OTU level) between controls and non-advanced or advanced conventional adenoma cases, as detected by the DESeq function in the DESeq2 package. Models were adjusted for age, sex, categorical BMI, and study. All taxa with an FDR-adjusted  $q < 0.10$  are included in the table.

| Taxon name   | Taxon classification                                                                 | Level  | Non-advanced conventional adenoma cases vs. controls |                         |                      | Advanced conventional adenoma cases vs. controls |           |                      |           |           |
|--------------|--------------------------------------------------------------------------------------|--------|------------------------------------------------------|-------------------------|----------------------|--------------------------------------------------|-----------|----------------------|-----------|-----------|
|              |                                                                                      |        | Mean normalized count                                | Maximum Cook's Distance | Fold change (95% CI) | p-value                                          | q-value   | Fold change (95% CI) | p-value   | q-value   |
| denovo783221 | Actinobacteria; Actinobacteria; Actinomycetales                                      | Order  | 6.42                                                 | 0.69                    | 1.28 (0.99, 1.65)    | 0.0648277                                        | 0.2715552 | 5.38 (3.24, 8.92)    | 7.00E-11  | 1.57E-09  |
| denovo783221 | Actinobacteria; Actinobacteria; Actinomycetales; Actinomycetaceae                    | Family | 6.95                                                 | 0.25                    | 1.36 (1.05, 1.77)    | 0.0204213                                        | 0.179707  | 2.22 (1.31, 3.78)    | 0.0031626 | 0.0278311 |
| denovo783221 | Actinobacteria; Actinobacteria; Actinomycetales; Actinomycetaceae; Actinomycetes     | Genus  | 9.08                                                 | 0.65                    | 1.57 (1.2, 2.04)     | 0.0008837                                        | 0.0139617 | 2.35 (1.38, 4.01)    | 0.0017422 | 0.019662  |
| denovo184823 | Actinobacteria; Actinobacteria; Actinomycetales; Corynebacteriaceae                  | Family | 0.94                                                 | 1.1                     | 1.17 (0.57, 2.39)    | 0.6690566                                        | 0.8920754 | 15.32 (4.53, 51.78)  | 1.12E-05  | 0.0002454 |
| denovo184823 | Actinobacteria; Actinobacteria; Actinomycetales; Corynebacteriaceae; Corynebacterium | Genus  | 1.03                                                 | 1.68                    | 1.28 (0.62, 2.62)    | 0.5068122                                        | 0.7850621 | 16.69 (5.04, 55.28)  | 4.06E-06  | 0.000107  |
| denovo670950 | Bacteroidetes; Bacteroidia; Bacteroidales; [Barnesiellaceae]                         | Family | 117.2                                                | 0.06                    | 0.97 (0.59, 1.58)    | 0.8965212                                        | 0.9786016 | 0.3 (0.12, 0.76)     | 0.01167   | 0.0649406 |
| denovo670950 | Bacteroidetes; Bacteroidia; Bacteroidales; [Barnesiellaceae]; NA                     | Genus  | 117.29                                               | 0.04                    | 1.03 (0.63, 1.68)    | 0.902878                                         | 0.9865789 | 0.31 (0.12, 0.78)    | 0.0128032 | 0.0957327 |
| denovo653463 | Bacteroidetes; Bacteroidia; Bacteroidales; [Odoribacteraceae]; Odoribacter           | Genus  | 57.73                                                | 3.73                    | 1.71 (1.14, 2.54)    | 0.0087086                                        | 0.098283  | 0.59 (0.27, 1.29)    | 0.1884404 | 0.4841002 |
| denovo724396 | Bacteroidetes; Bacteroidia; Bacteroidales; Porphyromonadaceae; Porphyromonas         | Genus  | 0.68                                                 | 1                       | 0.59 (0.24, 1.44)    | 0.2423762                                        | 0.6331259 | 9.78 (2.42, 39.48)   | 0.0013662 | 0.0184341 |
| denovo199602 | Cyanobacteria                                                                        | Phylum | 44.83                                                | 0.01                    | 0.52 (0.29, 0.95)    | 0.0343972                                        | 0.3439724 | 0.25 (0.1, 0.65)     | 0.0046533 | 0.0465331 |
| denovo317079 | Firmicutes; Bacilli                                                                  | Class  | 505.44                                               | 2.38                    | 2.16 (1.61, 2.9)     | 3.15E-07                                         | 5.35E-06  | 1.85 (1.03, 3.33)    | 0.0410949 | 0.1746532 |
| denovo317079 | Firmicutes; Bacilli; Lactobacillales                                                 | Order  | 467.44                                               | 2.33                    | 2.29 (1.67, 3.14)    | 2.23E-07                                         | 4.69E-06  | 2.05 (1.1, 3.82)     | 0.024549  | 0.1031057 |
| denovo194049 | Firmicutes; Bacilli; Lactobacillales; Lactobacillaceae; Lactobacillus; zeae          | OTU    | 1.92                                                 | 5.11                    | 3.73 (1.92, 7.26)    | 0.0001024                                        | 0.0597919 | 1.32 (0.5, 3.48)     | 0.5723943 | 0.8602159 |
| denovo317079 | Firmicutes; Bacilli; Lactobacillales; Streptococcaceae                               | Family | 376.64                                               | 1.21                    | 2.08 (1.52, 2.85)    | 4.39E-06                                         | 9.65E-05  | 1.85 (0.99, 3.44)    | 0.0524198 | 0.1893391 |
| denovo317079 | Firmicutes; Bacilli; Lactobacillales; Streptococcaceae; Streptococcus                | Genus  | 422.04                                               | 3.6                     | 2.63 (1.91, 3.62)    | 3.62E-09                                         | 2.15E-07  | 1.48 (0.78, 2.78)    | 0.2277994 | 0.4934009 |
| denovo220332 | Firmicutes; Clostridia; Clostridiales; [Mogibacteriaceae]; NA                        | Genus  | 16.23                                                | 0.13                    | 0.81 (0.67, 0.98)    | 0.0338923                                        | 0.2434084 | 0.61 (0.41, 0.92)    | 0.0172183 | 0.0971602 |
| denovo784890 | Firmicutes; Clostridia; Clostridiales; [Tissierellaceae]                             | Family | 6.73                                                 | 3.73                    | 1.14 (0.66, 1.97)    | 0.6297732                                        | 0.8833394 | 14.97 (5.48, 40.89)  | 1.31E-07  | 5.75E-06  |
| denovo712300 | Firmicutes; Clostridia; Clostridiales; [Tissierellaceae]; Anaerococcus               | Genus  | 2.02                                                 | 6.82                    | 0.9 (0.41, 1.99)     | 0.7968062                                        | 0.9537529 | 8.67 (2.35, 32.03)   | 0.0011968 | 0.0184341 |
| denovo784890 | Firmicutes; Clostridia; Clostridiales; [Tissierellaceae]; Finegoldia                 | Genus  | 2.26                                                 | 9.96                    | 1.73 (0.81, 3.72)    | 0.1578763                                        | 0.5321187 | 28.25 (7.89, 101.09) | 2.80E-07  | 2.22E-05  |
| denovo113729 | Firmicutes; Clostridia; Clostridiales; [Tissierellaceae]; Peptoniphilus              | Genus  | 1.61                                                 | 1.72                    | 1.29 (0.68, 2.45)    | 0.4417771                                        | 0.7425615 | 17.18 (5.62, 52.46)  | 6.00E-07  | 2.37E-05  |
| denovo113729 | Firmicutes; Clostridia; Clostridiales; [Tissierellaceae]; Peptoniphilus; NA          | OTU    | 0.71                                                 | 1.4                     | 1.07 (0.55, 2.06)    | 0.8457738                                        | 0.9884577 | 9.12 (3.56, 23.33)   | 4.02E-06  | 0.0094006 |
| denovo903712 | Firmicutes; Clostridia; Clostridiales; Christensenellaceae                           | Family | 102.53                                               | 0.36                    | 1 (0.7, 1.43)        | 0.996671                                         | 0.996671  | 0.3 (0.15, 0.61)     | 0.0009675 | 0.0141894 |
| denovo903712 | Firmicutes; Clostridia; Clostridiales; Christensenellaceae; NA                       | Genus  | 103.95                                               | 0.4                     | 1.11 (0.77, 1.6)     | 0.573488                                         | 0.8336451 | 0.31 (0.15, 0.64)    | 0.0014001 | 0.0184341 |
| denovo287355 | Firmicutes; Clostridia; Clostridiales; Clostridiaceae; Clostridium; NA               | OTU    | 0.5                                                  | 0.08                    | 0.24 (0.12, 0.49)    | 9.44E-05                                         | 0.0597919 | 0.29 (0.11, 0.77)    | 0.0132321 | 0.4319583 |
| denovo23546  | Firmicutes; Clostridia; Clostridiales; Lachnospiraceae; Dorea                        | Genus  | 215.62                                               | 0.08                    | 1.21 (1.05, 1.38)    | 0.0062116                                        | 0.081786  | 1.07 (0.81, 1.4)     | 0.6499173 | 0.7844788 |
| denovo189398 | Firmicutes; Clostridia; Clostridiales; Lachnospiraceae; Dorea; NA                    | OTU    | 12.03                                                | 5.73                    | 2.68 (1.61, 4.46)    | 0.0001405                                        | 0.0656498 | 2.19 (0.95, 5.06)    | 0.0669658 | 0.5203333 |
| denovo667264 | Firmicutes; Clostridia; Clostridiales; Lachnospiraceae; Lachnobacterium              | Genus  | 7.25                                                 | 0.1                     | 0.87 (0.64, 1.2)     | 0.4034635                                        | 0.7412468 | 0.43 (0.22, 0.84)    | 0.0133299 | 0.0957327 |
| denovo525776 | Firmicutes; Clostridia; Clostridiales; Lachnospiraceae; Lachnospira                  | Genus  | 317.71                                               | 0.05                    | 0.91 (0.73, 1.14)    | 0.4348417                                        | 0.7425615 | 0.58 (0.37, 0.9)     | 0.0162025 | 0.0971602 |
| denovo521268 | Firmicutes; Clostridia; Clostridiales; Lachnospiraceae; NA; NA                       | OTU    | 1.58                                                 | 1.66                    | 0.17 (0.08, 0.36)    | 2.24E-06                                         | 0.0026178 | 0.35 (0.13, 0.94)    | 0.0378641 | 0.5008256 |
| denovo171687 | Firmicutes; Clostridia; Clostridiales; NA                                            | Family | 2417.97                                              | 1.72                    | 1.28 (1.12, 1.46)    | 0.0002384                                        | 0.0034961 | 1 (0.77, 1.3)        | 0.9904776 | 0.9904776 |
| denovo171687 | Firmicutes; Clostridia; Clostridiales; NA; NA                                        | Genus  | 2628.04                                              | 3.57                    | 1.54 (1.33, 1.78)    | 5.43E-09                                         | 2.15E-07  | 1.03 (0.77, 1.38)    | 0.8428564 | 0.8823091 |
| denovo12383  | Firmicutes; Clostridia; Clostridiales; Ruminococcaceae; NA; NA                       | OTU    | 2.16                                                 | 0.01                    | 0.08 (0.04, 0.17)    | 1.00E-11                                         | 3.26E-08  | 0.35 (0.13, 0.92)    | 0.0342761 | 0.4956075 |
| denovo294260 | Firmicutes; Clostridia; Clostridiales; Ruminococcaceae; NA; NA                       | OTU    | 2.69                                                 | 0.06                    | 0.48 (0.33, 0.71)    | 0.0002483                                        | 0.0828736 | 0.71 (0.35, 1.45)    | 0.3509341 | 0.7440348 |
| denovo699246 | Firmicutes; Clostridia; Clostridiales; Ruminococcaceae; NA; NA                       | OTU    | 2.06                                                 | 0.51                    | 0.37 (0.22, 0.63)    | 0.000233                                         | 0.0828736 | 0.56 (0.23, 1.33)    | 0.1890542 | 0.6389356 |
| denovo422375 | Firmicutes; Clostridia; Clostridiales; Veillonellaceae                               | Family | 476.74                                               | 6.28                    | 2.15 (1.65, 2.82)    | 2.16E-08                                         | 9.52E-07  | 0.82 (0.48, 1.4)     | 0.4589797 | 0.5609752 |
| denovo437434 | Firmicutes; Clostridia; Clostridiales; Veillonellaceae; Phascolarctobacterium        | Genus  | 115.56                                               | 4.63                    | 2.31 (1.45, 3.67)    | 0.0004435                                        | 0.0087597 | 0.79 (0.33, 1.92)    | 0.6078289 | 0.7733044 |
| denovo188989 | Proteobacteria; Alphaproteobacteria                                                  | Class  | 128.11                                               | 0.03                    | 0.63 (0.34, 1.19)    | 0.1538695                                        | 0.5231564 | 0.18 (0.06, 0.58)    | 0.0043142 | 0.0733417 |
| denovo188989 | Proteobacteria; Alphaproteobacteria; RF32                                            | Order  | 125.53                                               | 0.03                    | 0.61 (0.31, 1.17)    | 0.1350111                                        | 0.4050334 | 0.2 (0.06, 0.66)     | 0.0083271 | 0.0501856 |
| denovo188989 | Proteobacteria; Alphaproteobacteria; RF32; NA                                        | Family | 116.83                                               | 0.01                    | 0.58 (0.3, 1.12)     | 0.1061811                                        | 0.3839762 | 0.21 (0.06, 0.67)    | 0.0089852 | 0.0649406 |
| denovo188989 | Proteobacteria; Alphaproteobacteria; RF32; NA; NA                                    | Genus  | 115.14                                               | 0.01                    | 0.62 (0.32, 1.19)    | 0.1485187                                        | 0.5321187 | 0.23 (0.07, 0.73)    | 0.0125152 | 0.0957327 |
| denovo880054 | Proteobacteria; Betaproteobacteria; Burkholderiales; Alcaligenaceae                  | Family | 312.77                                               | 3.63                    | 1.66 (1.22, 2.27)    | 0.0012249                                        | 0.0134734 | 0.95 (0.51, 1.75)    | 0.8687267 | 0.8889296 |
| denovo880054 | Proteobacteria; Betaproteobacteria; Burkholderiales; Alcaligenaceae; Sutterella      | Genus  | 430.87                                               | 6.92                    | 2.48 (1.79, 3.42)    | 3.57E-08                                         | 9.39E-07  | 0.88 (0.47, 1.66)    | 0.6909691 | 0.7971924 |
| denovo840450 | Proteobacteria; Gammaproteobacteria; Pasteurellales                                  | Order  | 14.4                                                 | 1.08                    | 0.73 (0.45, 1.18)    | 0.1971867                                        | 0.5176152 | 3.85 (1.53, 9.7)     | 0.0042946 | 0.0450935 |
| denovo840450 | Proteobacteria; Gammaproteobacteria; Pasteurellales; Pasteurellaceae                 | Family | 13.38                                                | 0.19                    | 0.69 (0.43, 1.11)    | 0.1221742                                        | 0.3839762 | 4.26 (1.72, 10.51)   | 0.0016864 | 0.0185508 |
| denovo840450 | Proteobacteria; Gammaproteobacteria; Pasteurellales; Pasteurellaceae; Haemophilus    | Genus  | 13.31                                                | 0.17                    | 0.77 (0.47, 1.25)    | 0.2885131                                        | 0.6331259 | 3.69 (1.48, 9.17)    | 0.0049722 | 0.0491005 |
| denovo789089 | Tenericutes; Mollicutes; RF39                                                        | Order  | 40.35                                                | 0.03                    | 0.45 (0.23, 0.9)     | 0.0227849                                        | 0.1594944 | 0.19 (0.06, 0.67)    | 0.0095592 | 0.0501856 |
| denovo789089 | Tenericutes; Mollicutes; RF39; NA                                                    | Family | 35.68                                                | 0.04                    | 0.47 (0.24, 0.92)    | 0.0266385                                        | 0.1939091 | 0.21 (0.06, 0.71)    | 0.0118074 | 0.0649406 |
| denovo789089 | Tenericutes; Mollicutes; RF39; NA; NA                                                | Genus  | 36.48                                                | 0.05                    | 0.45 (0.23, 0.89)    | 0.0211111                                        | 0.1667766 | 0.23 (0.07, 0.76)    | 0.0161438 | 0.0971602 |

**Supplementary Table 8.** Sensitivity analysis - excluding participants (n=5) who collected their stool sample <2 weeks after their colonoscopy.

|                                 | CA cases (n=144)<br>vs. controls (n=319) |                            | HP cases (n=39)<br>vs. controls (n=319) |                            | SSA cases (n=33)<br>vs. controls (n=319) |                            |
|---------------------------------|------------------------------------------|----------------------------|-----------------------------------------|----------------------------|------------------------------------------|----------------------------|
|                                 | B (95% CI) <sup>b</sup>                  | P-value <sup>b</sup>       | B (95% CI) <sup>b</sup>                 | P-value <sup>b</sup>       | B (95% CI) <sup>b</sup>                  | P-value <sup>b</sup>       |
| <b>α-diversity<sup>a</sup></b>  |                                          |                            |                                         |                            |                                          |                            |
| Richness                        | -31.0 (-56.1, -5.9)                      | 0.02                       | 30.6 (-11.2, 72.5)                      | 0.15                       | -3.1 (-47.8, 41.5)                       | 0.89                       |
| Shannon index                   | -0.13 (-0.26, 0.00)                      | 0.06                       | 0.17 (-0.04, 0.39)                      | 0.12                       | 0.01 (-0.23, 0.24)                       | 0.96                       |
| <b>β-diversity</b>              |                                          | <b>P-value<sup>c</sup></b> |                                         | <b>P-value<sup>c</sup></b> |                                          | <b>P-value<sup>c</sup></b> |
| Unweighted UniFrac              |                                          | 0.06                       |                                         | 0.33                       |                                          | 0.73                       |
| Weighted UniFrac                |                                          | 0.16                       |                                         | 0.73                       |                                          | 0.82                       |
| JSD                             |                                          | 0.08                       |                                         | 0.73                       |                                          | 0.86                       |
| <b>Selected taxon abundance</b> | <b>Fold change (95% CI)<sup>d</sup></b>  | <b>P-value<sup>d</sup></b> | <b>Fold change (95% CI)<sup>d</sup></b> | <b>P-value<sup>d</sup></b> | <b>Fold change (95% CI)<sup>d</sup></b>  | <b>P-value<sup>d</sup></b> |
| Bacilli                         | 2.07 (1.58, 2.72)                        | 1.30E-07                   | 1.25 (0.82, 1.9)                        | 0.30                       | 0.84 (0.54, 1.31)                        | 0.44                       |
| Erysipelotrichi                 | 0.91 (0.79, 1.06)                        | 0.24                       | 1.05 (0.82, 1.35)                       | 0.68                       | 0.69 (0.53, 0.89)                        | 0.005                      |
| Gammaproteobacteria             | 1.78 (1.2, 2.63)                         | 0.004                      | 0.42 (0.24, 0.74)                       | 0.003                      | 0.51 (0.28, 0.92)                        | 0.03                       |
| Enterobacteriales               | 2.06 (1.24, 3.43)                        | 0.005                      | 0.22 (0.1, 0.51)                        | 0.0004                     | 0.45 (0.19, 1.09)                        | 0.08                       |
| Actinomyces                     | 1.7 (1.33, 2.19)                         | 2.86E-05                   | 1.2 (0.79, 1.82)                        | 0.39                       | 1.07 (0.7, 1.64)                         | 0.75                       |
| Streptococcus                   | 2.38 (1.76, 3.22)                        | 2.00E-08                   | 1.28 (0.78, 2.09)                       | 0.32                       | 0.72 (0.43, 1.22)                        | 0.22                       |

<sup>a</sup>These indices were calculated for 500 iterations of rarefied (4000 sequences per sample) OTU tables, and the average over the iterations was taken for each participant (1 control excluded due to sequencing depth=2088).

<sup>b</sup>Betas and p-values for difference between cases and controls from multiple linear regression, adjusting for age, sex, categorical BMI, and study.

<sup>c</sup>P-values for difference between cases and controls from PERMANOVA of the distance matrix, adjusting for age, sex, categorical BMI, and study.

<sup>d</sup>Fold changes and p-values from DESeq2 models adjusted for age, sex, categorical BMI, and study.

**Supplementary Table 9.** Sensitivity analysis - excluding participants (n=19 from the NYU study) who had taken antibiotics within 30 days prior to sample collection (antibiotic usage information was not available in the CDC study).

|                                 | CA cases (n=135)<br>vs. controls (n=314) |                            | HP cases (n=39)<br>vs. controls (n=314) |                            | SSA cases (n=33)<br>vs. controls (n=314) |                            |
|---------------------------------|------------------------------------------|----------------------------|-----------------------------------------|----------------------------|------------------------------------------|----------------------------|
|                                 | B (95% CI) <sup>b</sup>                  | P-value <sup>b</sup>       | B (95% CI) <sup>b</sup>                 | P-value <sup>b</sup>       | B (95% CI) <sup>b</sup>                  | P-value <sup>b</sup>       |
| <b>α-diversity<sup>a</sup></b>  |                                          |                            |                                         |                            |                                          |                            |
| Richness                        | -31.2 (-57.1, -5.3)                      | 0.02                       | 36.7 (-5.5, 78.9)                       | 0.09                       | -1.6 (-46.7, 43.4)                       | 0.94                       |
| Shannon index                   | -0.12 (-0.26, 0.01)                      | 0.08                       | 0.21 (-0.01, 0.43)                      | 0.07                       | 0.02 (-0.22, 0.25)                       | 0.89                       |
| <b>β-diversity</b>              |                                          | <b>P-value<sup>c</sup></b> |                                         | <b>P-value<sup>c</sup></b> |                                          | <b>P-value<sup>c</sup></b> |
| Unweighted UniFrac              |                                          | 0.12                       |                                         | 0.31                       |                                          | 0.75                       |
| Weighted UniFrac                |                                          | 0.15                       |                                         | 0.61                       |                                          | 0.80                       |
| JSD                             |                                          | 0.12                       |                                         | 0.76                       |                                          | 0.85                       |
| <b>Selected taxon abundance</b> | <b>Fold change (95% CI)<sup>d</sup></b>  | <b>P-value<sup>d</sup></b> | <b>Fold change (95% CI)<sup>d</sup></b> | <b>P-value<sup>d</sup></b> | <b>Fold change (95% CI)<sup>d</sup></b>  | <b>P-value<sup>d</sup></b> |
| Bacilli                         | 2.09 (1.57, 2.77)                        | 3.10E-07                   | 0.9 (0.57, 1.42)                        | 0.65                       | 0.79 (0.48, 1.28)                        | 0.33                       |
| Erysipelotrichi                 | 0.92 (0.79, 1.08)                        | 0.32                       | 1.09 (0.85, 1.4)                        | 0.48                       | 0.68 (0.52, 0.89)                        | 0.004                      |
| Gammaproteobacteria             | 1.69 (1.1, 2.59)                         | 0.02                       | 0.31 (0.16, 0.62)                       | 0.0008                     | 0.41 (0.2, 0.85)                         | 0.02                       |
| Enterobacteriales               | 1.9 (1.13, 3.19)                         | 0.02                       | 0.21 (0.09, 0.49)                       | 0.0002                     | 0.43 (0.18, 1.03)                        | 0.06                       |
| Actinomyces                     | 1.7 (1.32, 2.18)                         | 4.04E-05                   | 1.08 (0.71, 1.64)                       | 0.73                       | 1.06 (0.69, 1.63)                        | 0.78                       |
| Streptococcus                   | 2.43 (1.79, 3.3)                         | 1.00E-08                   | 0.85 (0.52, 1.38)                       | 0.51                       | 0.72 (0.43, 1.21)                        | 0.22                       |

<sup>a</sup>These indices were calculated for 500 iterations of rarefied (4000 sequences per sample) OTU tables, and the average over the iterations was taken for each participant (1 control excluded due to sequencing depth=2088).

<sup>b</sup>Betas and p-values for difference between cases and controls from multiple linear regression, adjusting for age, sex, categorical BMI, and study.

<sup>c</sup>P-values for difference between cases and controls from PERMANOVA of the distance matrix, adjusting for age, sex, categorical BMI, and study.

<sup>d</sup>Fold changes and p-values from DESeq2 models adjusted for age, sex, categorical BMI, and study.
